# Supplementary material for: An Optimized Shotgun Strategy for the Rapid Generation of Comprehensive Human Proteomes
Source: PubMed Central journal article supplement (PMC5493283; doi:10.1016/j.cels.2017.05.009), 2017-06-28
Supplement: mmc1.pdf [file mmc1.pdf]

**Cell Systems, Volume 4**

**Supplemental Information**

**An Optimized Shotgun Strategy  
for the Rapid Generation  
of Comprehensive Human Proteomes**

**Dorte B. Bekker-Jensen, Christian D. Kelstrup, Tanveer S. Batth, Sara C. Larsen, Christa Haldrup, Jesper B. Bramsen, Karina D. Sørensen, Søren Høyer, Torben F. Ørntoft, Claus L. Andersen, Michael L. Nielsen, and Jesper V. Olsen**

Figure S1

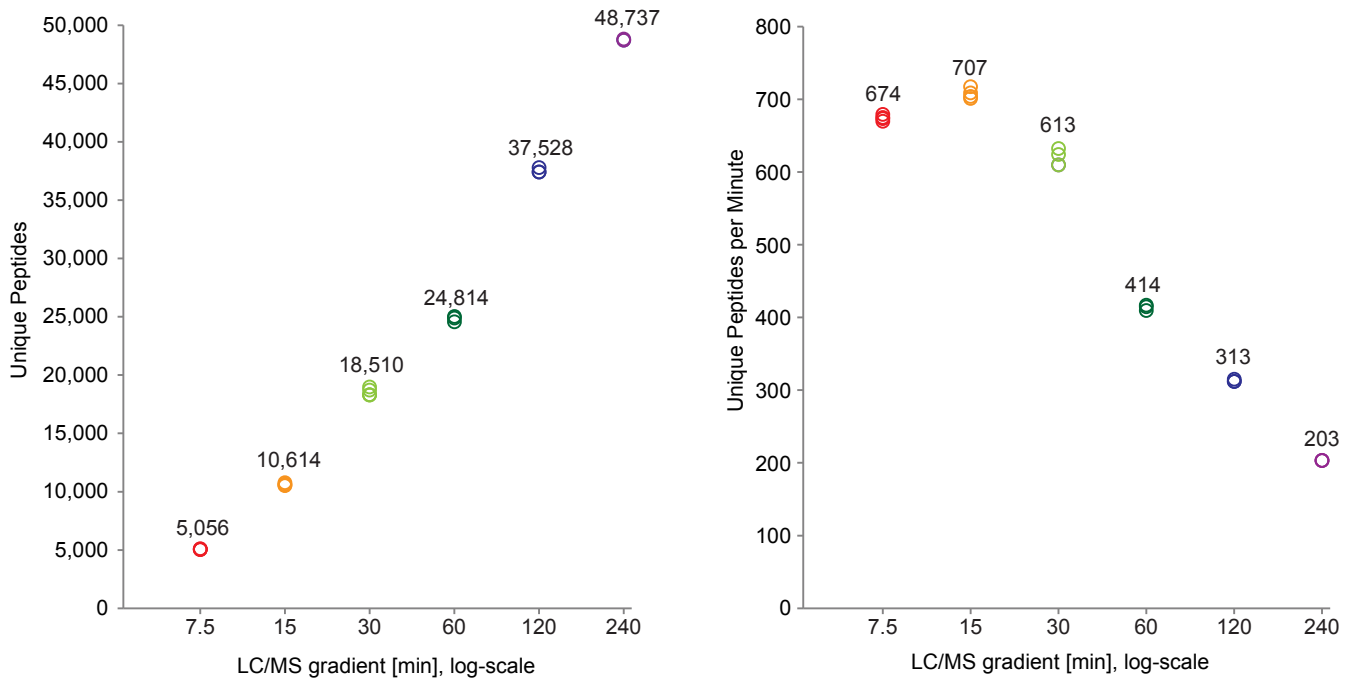

**Figure S1: Relationship between LC/MS gradient length and peptide identification rates.** Related to Figure 1. A fixed amount of 1ug Hela tryptic digest 'on column' was analyzed with variable gradient lengths. Optimal column and MS method was chosen for each time point. Left plot shows the total amount of unique peptides identified. The right plot shows the number of unique peptide identifications per minute. Above each time point the average of replica analysis is shown.

Figure S2

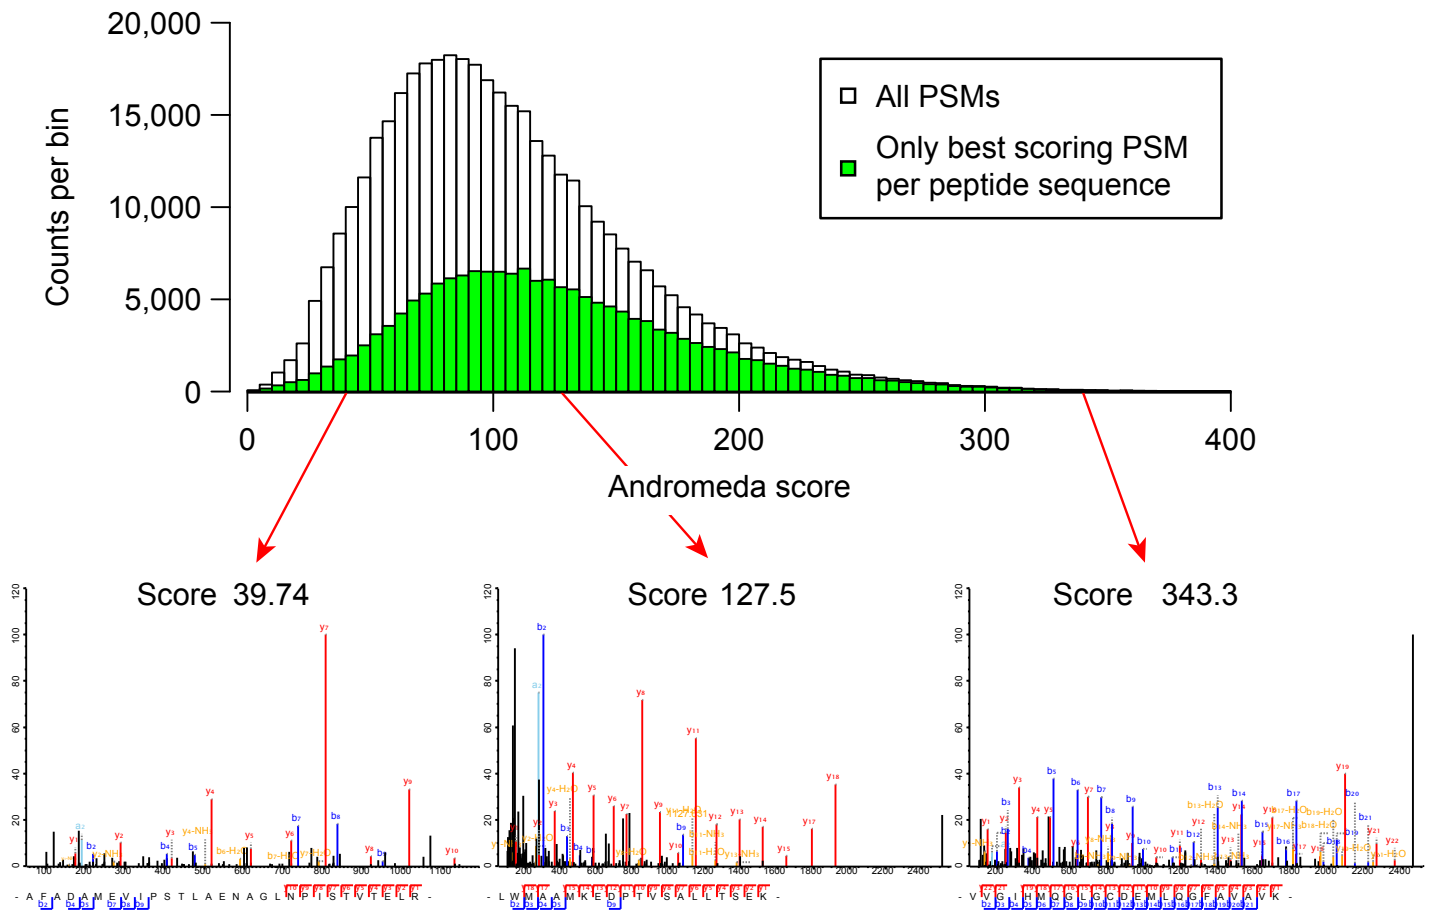

**Figure S2: Score distributions for the HeLa experiment fractionated in 46 fractions.** Related to Figure 1. The search engine (Andromeda) score distribution is shown for all PSMs and only the best scoring PSM per unique peptide sequence. Further, three annotated example spectra are shown for different scores.

Figure S3

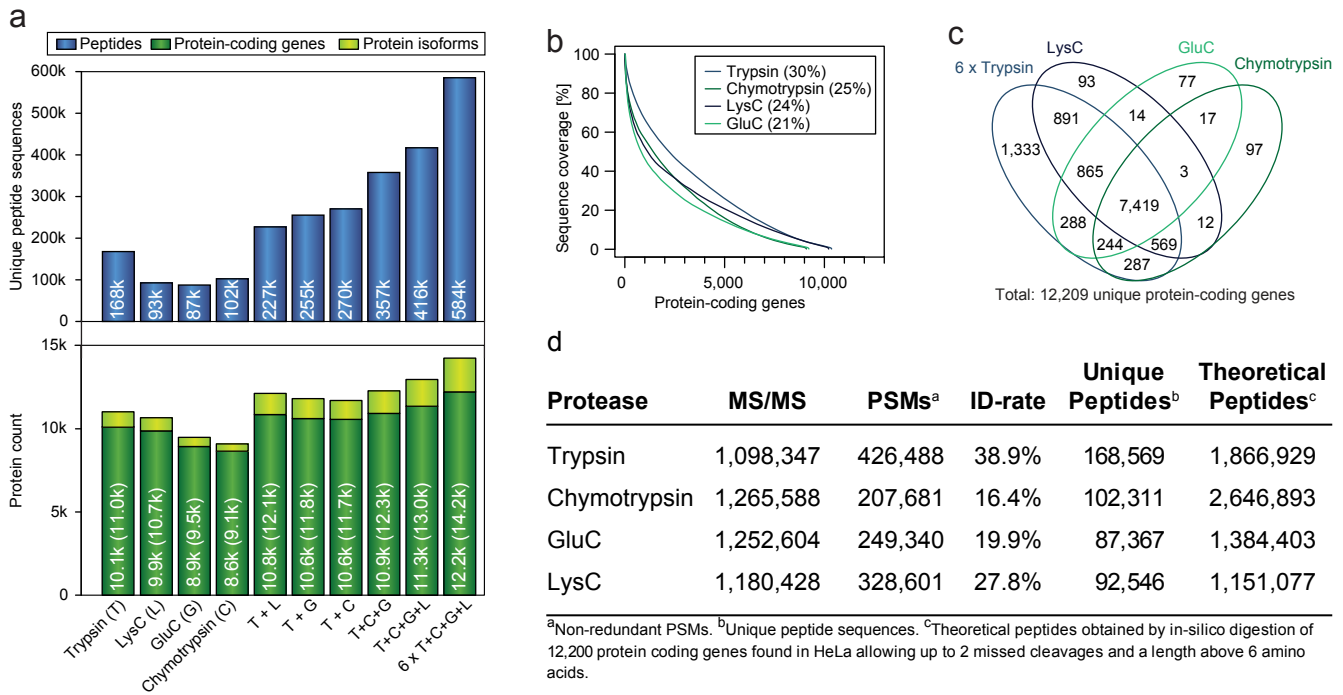

**Figure S3: Comparison of proteome coverage with different proteases.** Related to Figure 3. a) Peptide and protein comparison using different enzymes. Single and two way combination with trypsin and technical replicates of digests are provided. b) Sequence coverage comparison of the different proteases. c) Venn diagram of protein coding genes between proteases. d) Comparisons of technical details associated with each protease. The identification rate is the proportion of peptide spectrum matches (PSMs) relative to the total number of MS/MS events.

Figure S4

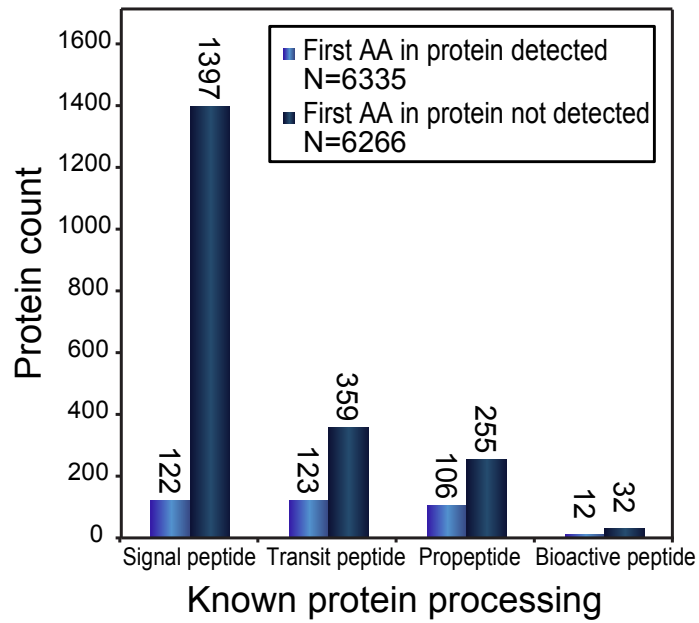

**Figure S4: Analysis of protein N-terminus.** Related to Figure 5. The two colours indicate whether an identified protein also had peptide sequence coverage of the first amino acid (AA) counted from the N-terminal of the protein. This analysis was extended to include different groups of known protein processing, obtained through annotation of the identified proteins from UniProt.

Figure S5

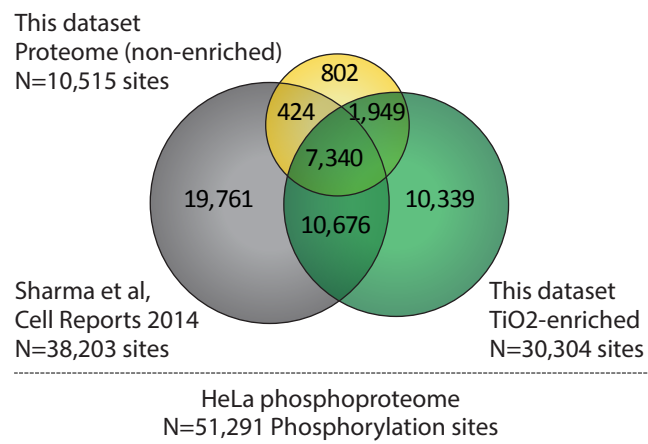

**Figure S5: Phosphopeptides in HeLa.** Related to Figure 5. Overlap of the phosphorylation sites found with and without enrichment compared to the largest HeLa phosphoproteome published to date.

Figure S6

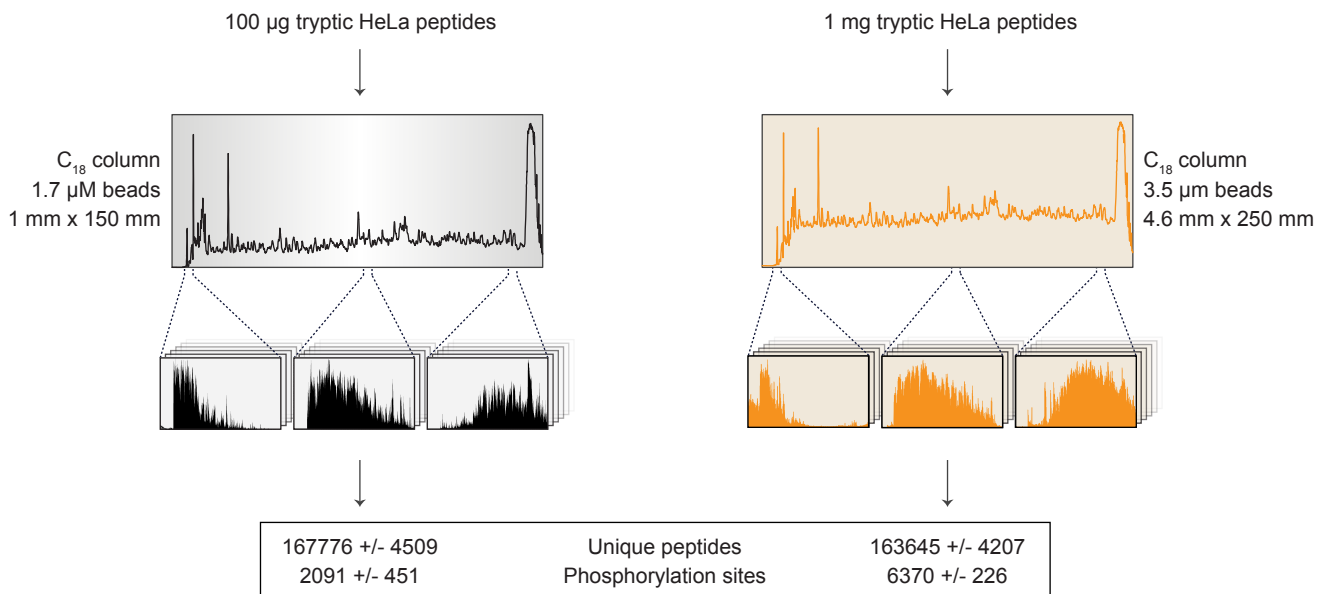

**Figure S6: Downscaling of the peptide amount input.** Related to Figure 7. Comparison of 100 µg tryptic HeLa peptides with 1 mg using the standard HpH 46 fractionation scheme.
